# Supplementary material
Source: PubMed Central journal article supplement (PMC3859454)

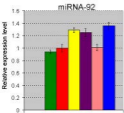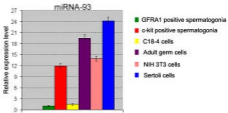

**A**

miRNA-20 probe

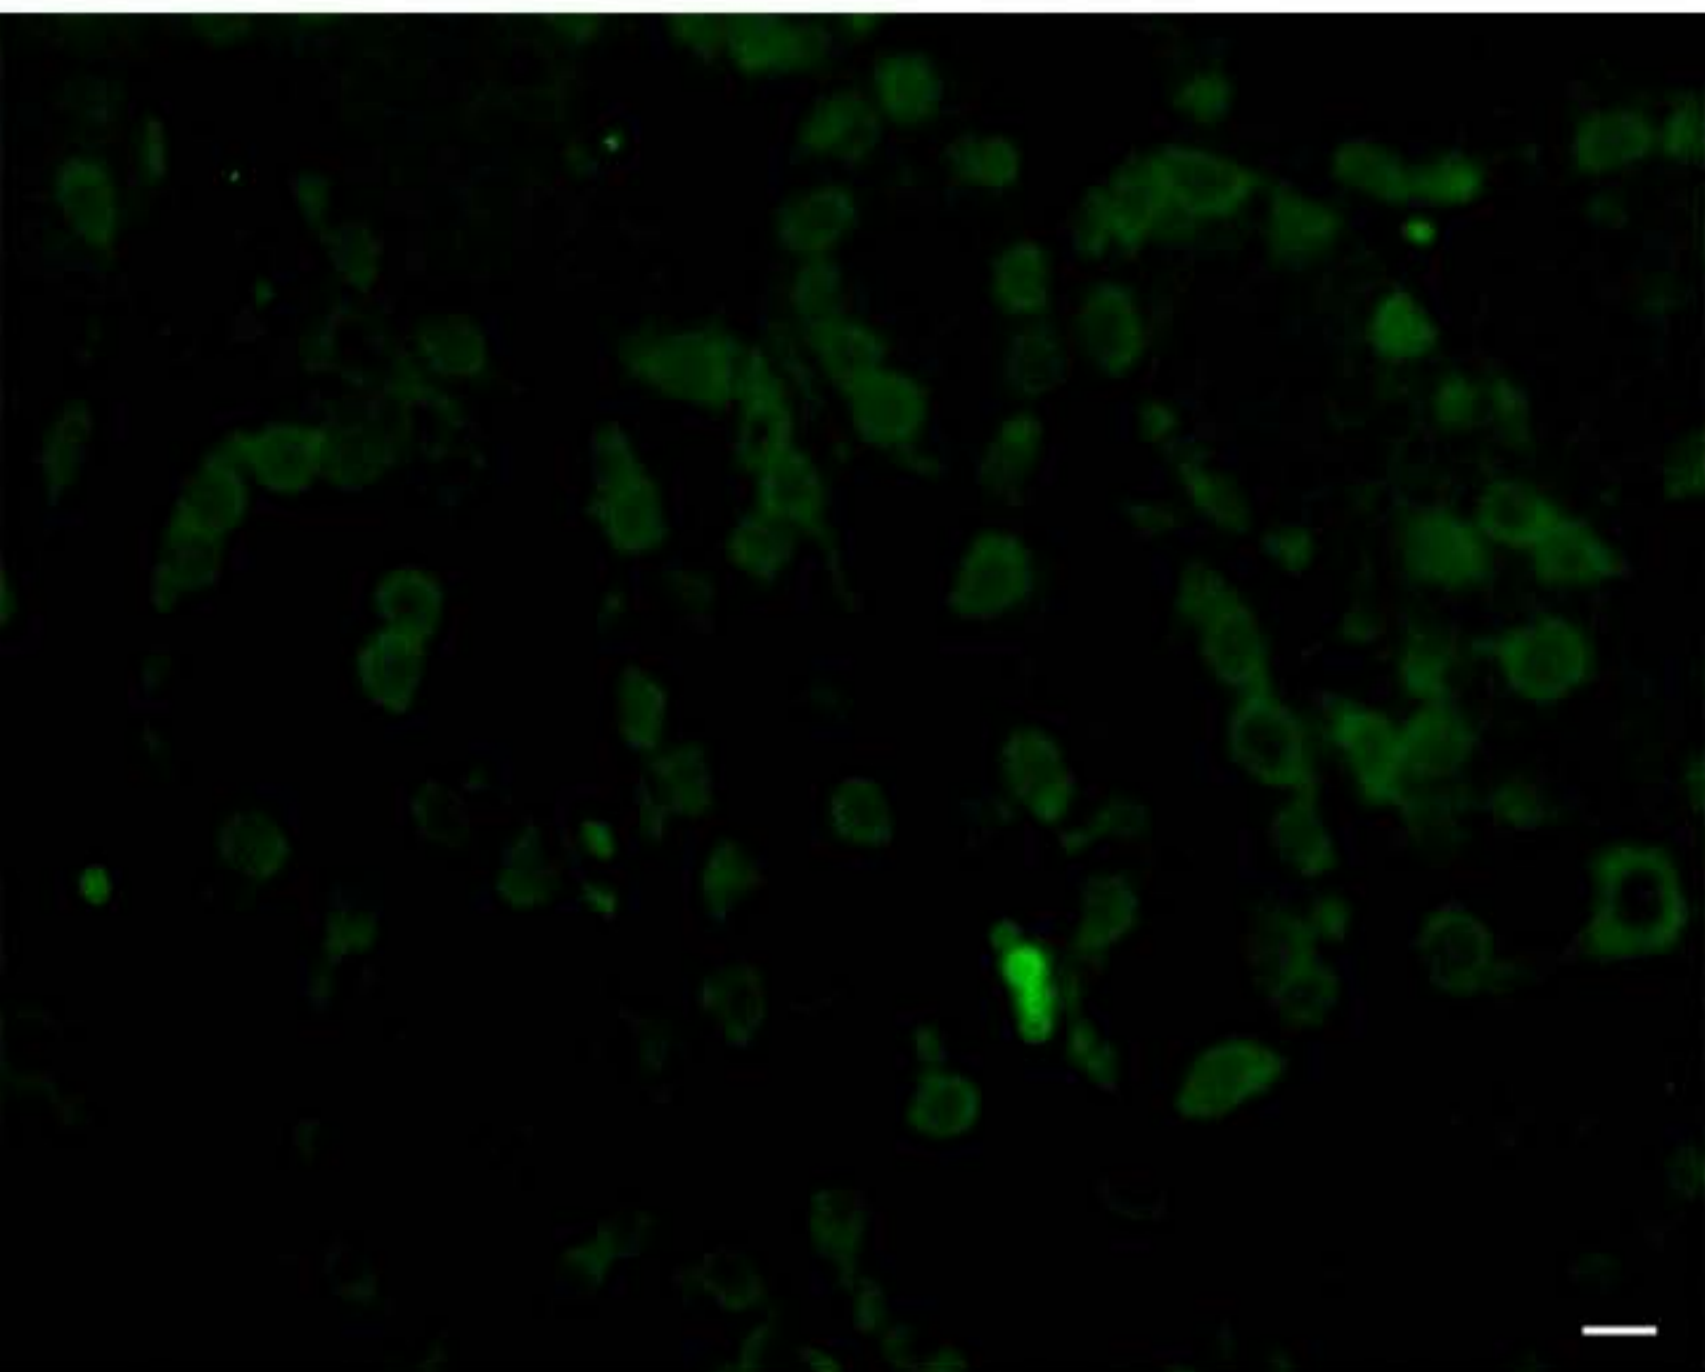**B**

miRNA-106a probe

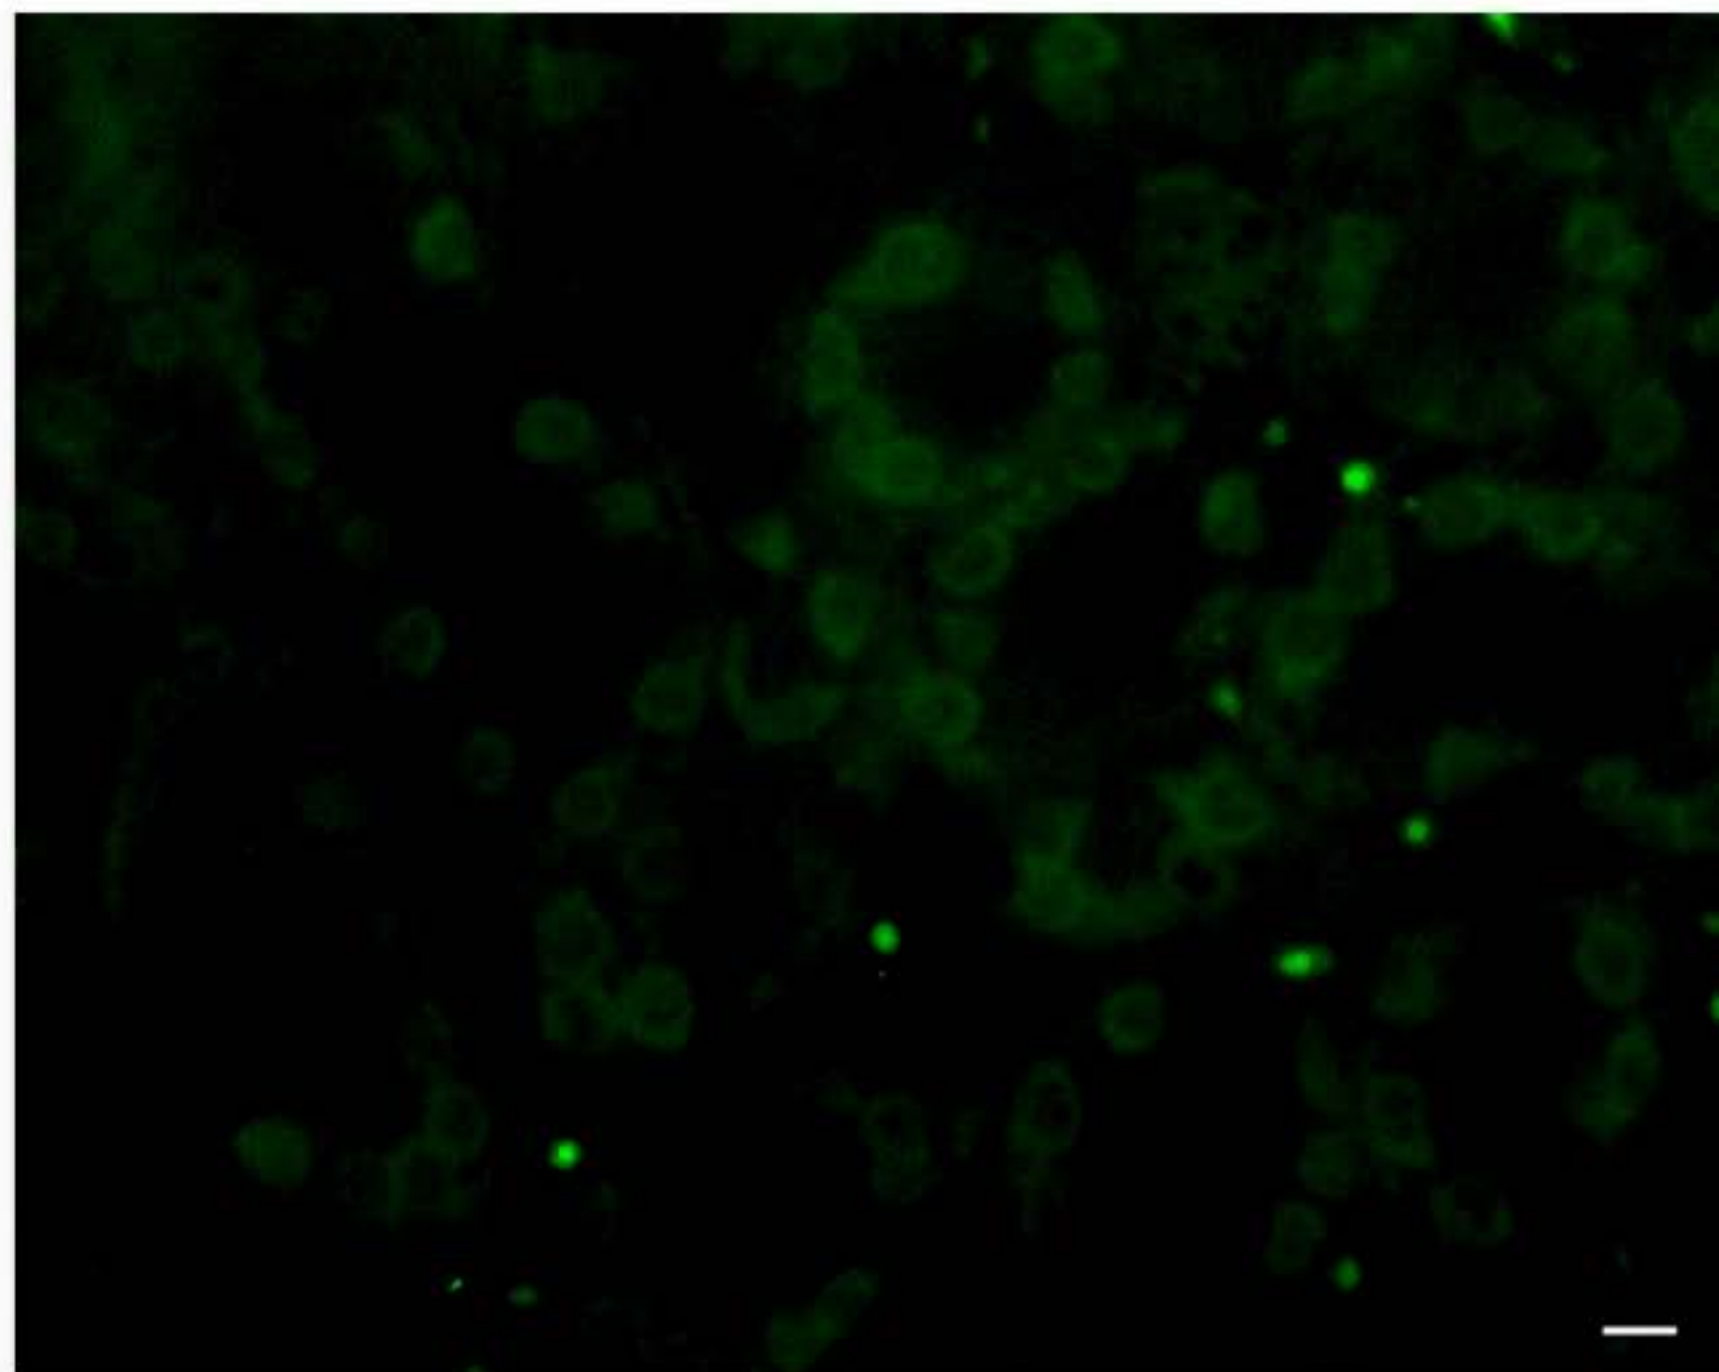**C**

No miRNA probe

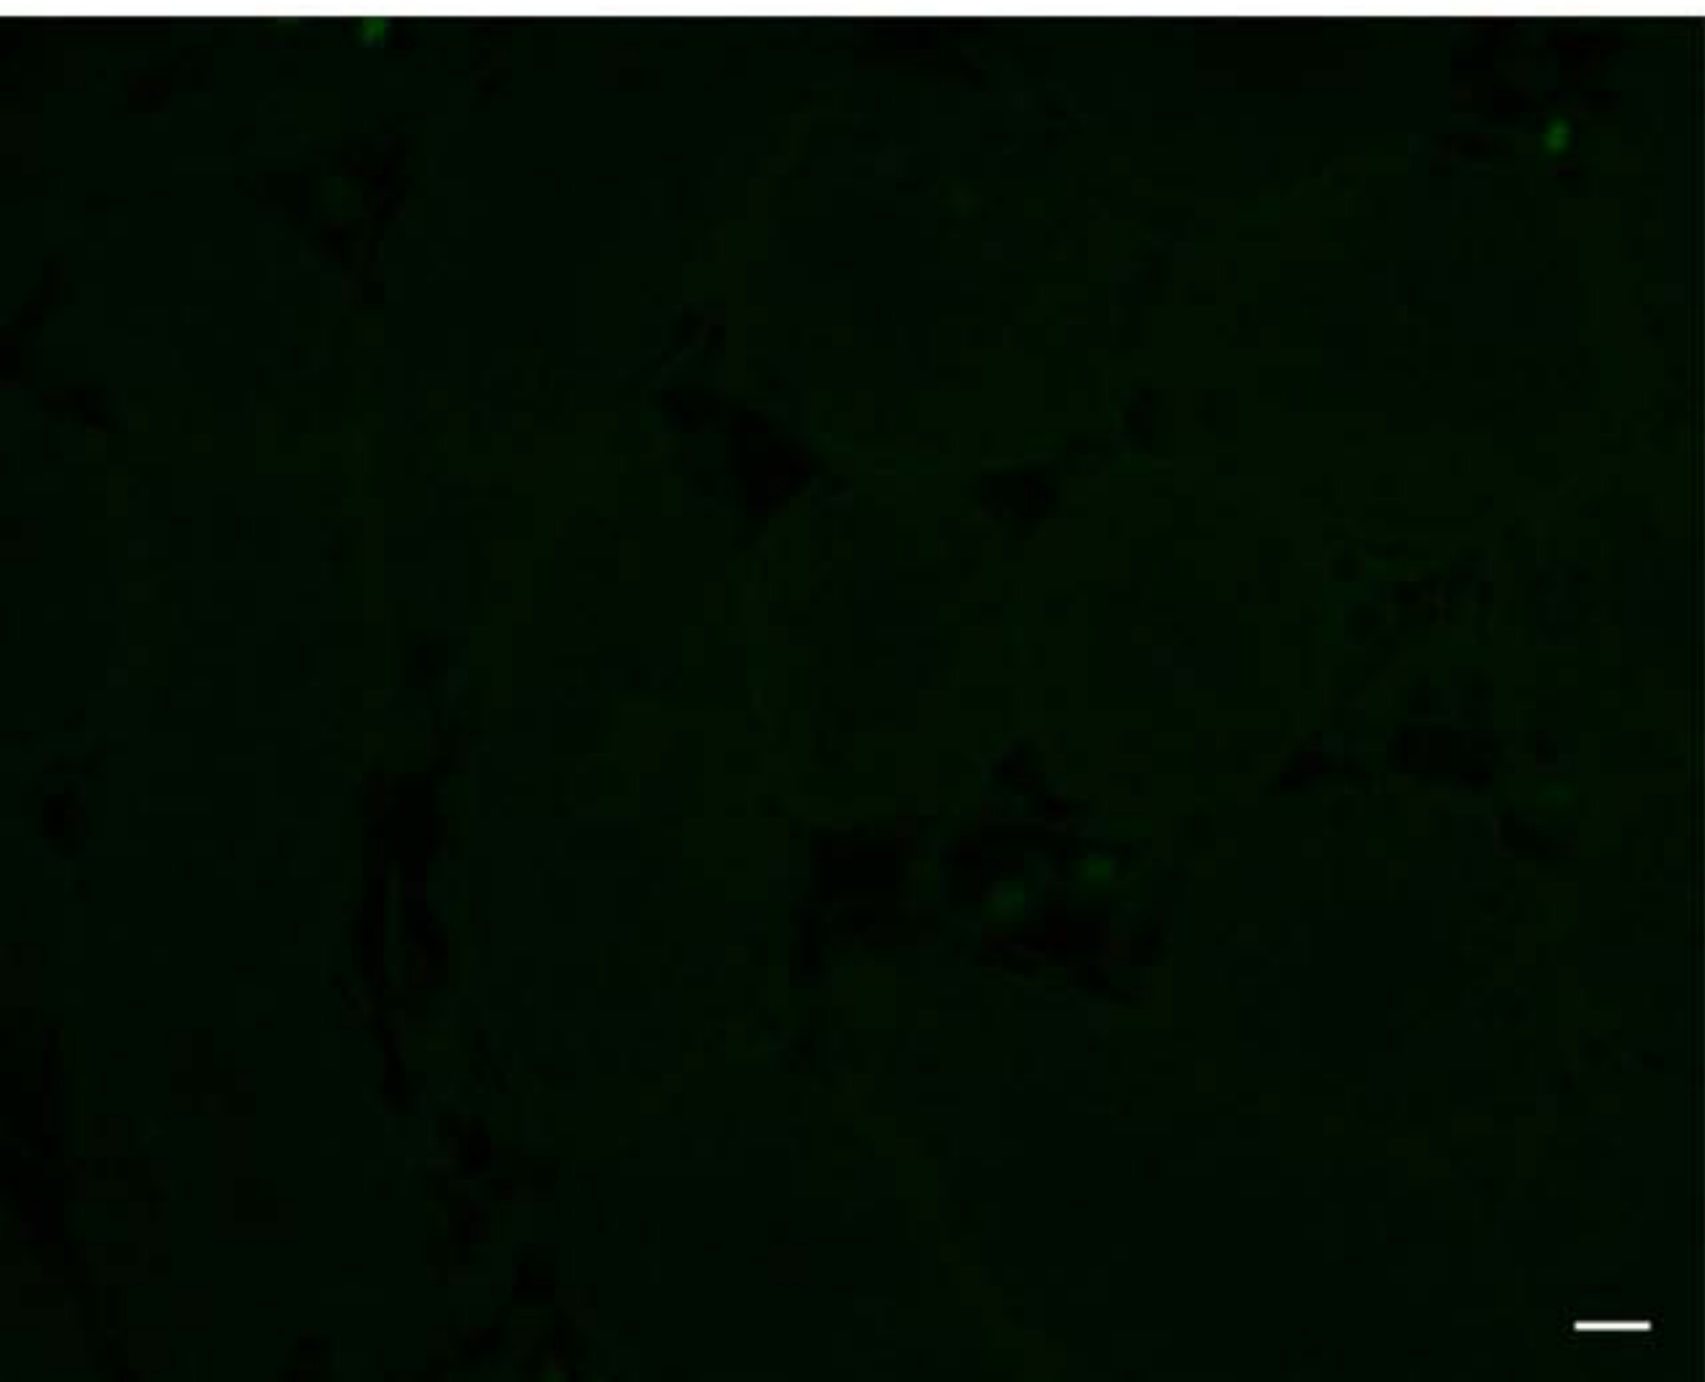**D**

No miRNA probe

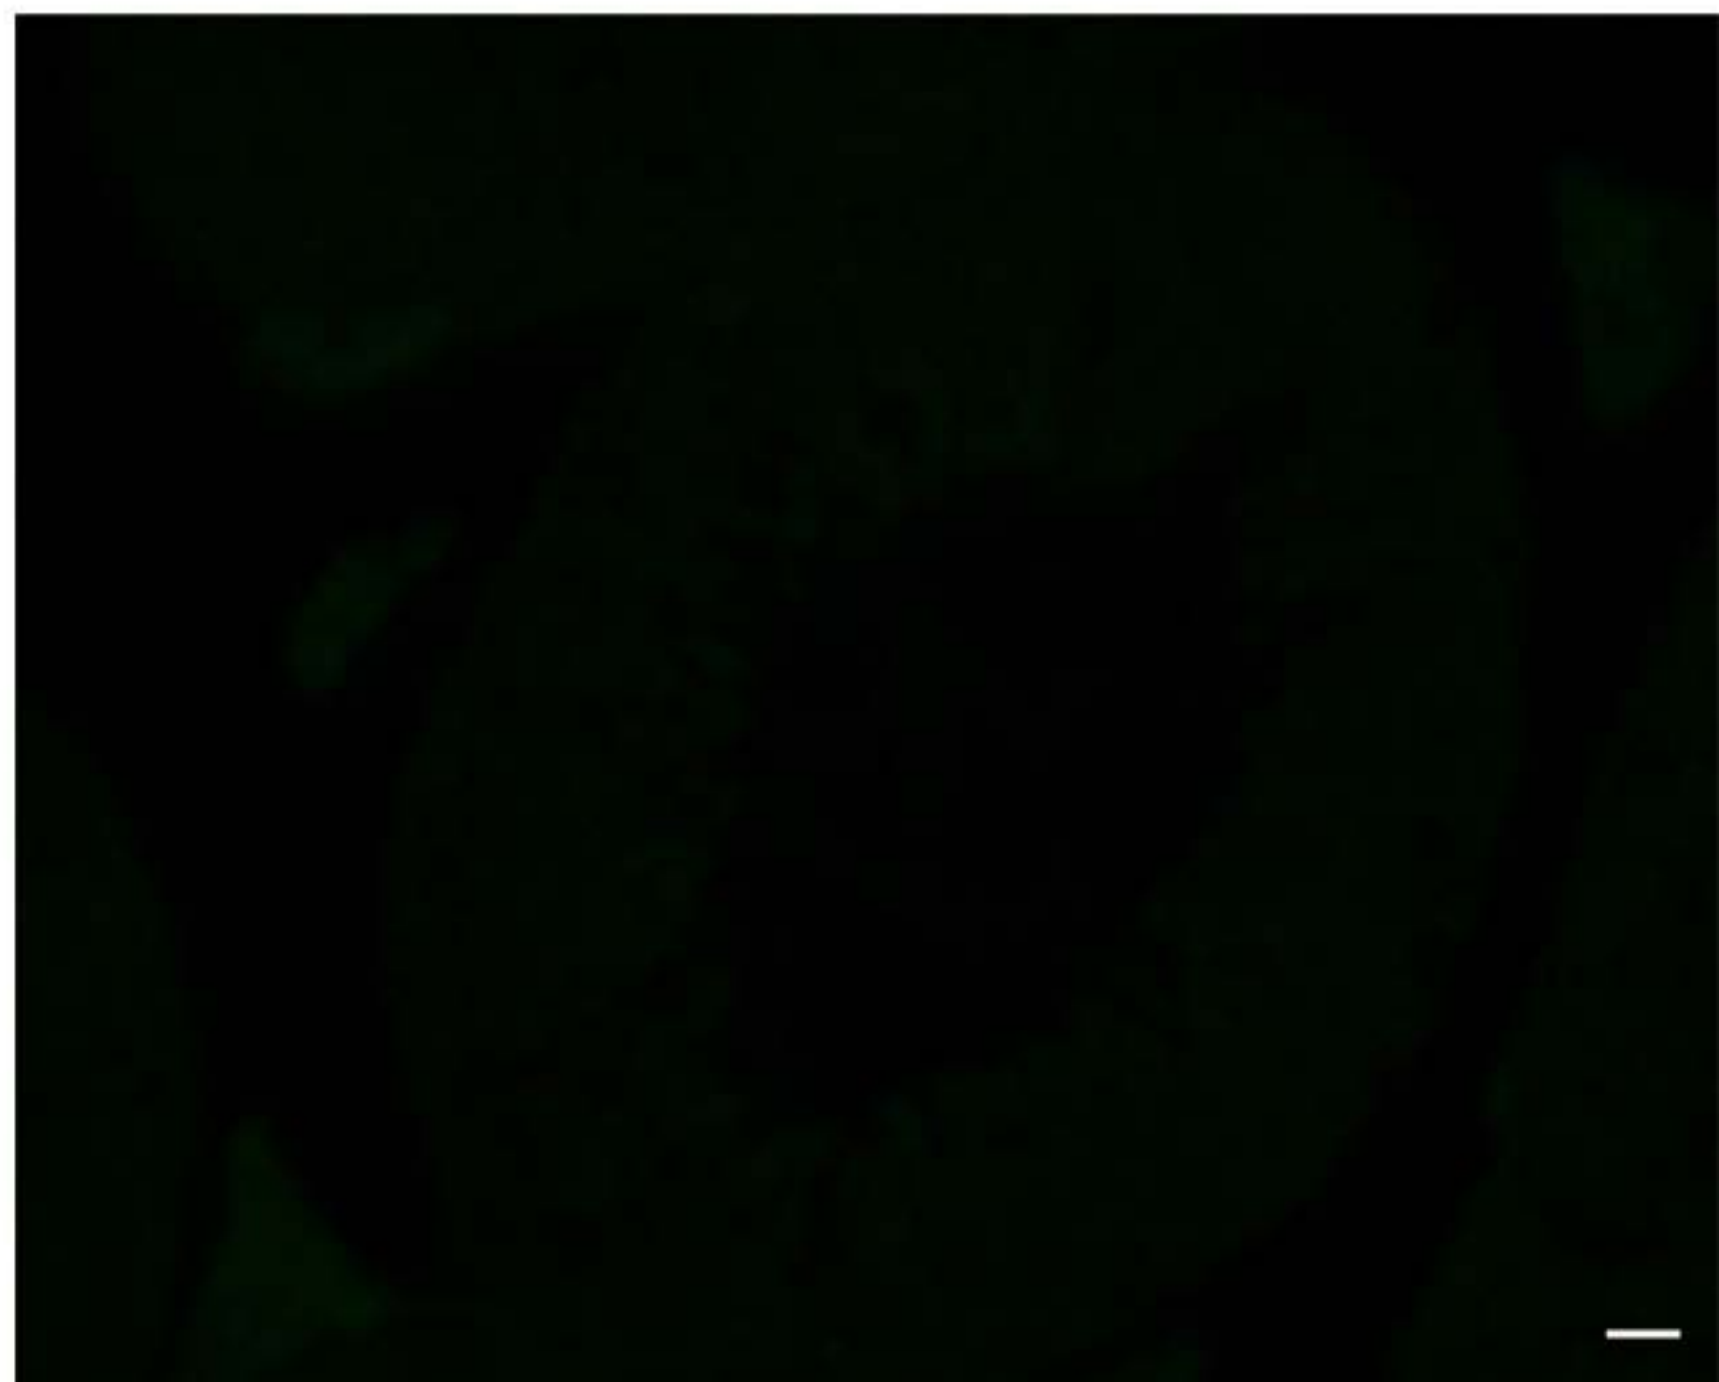

**A****eGFP**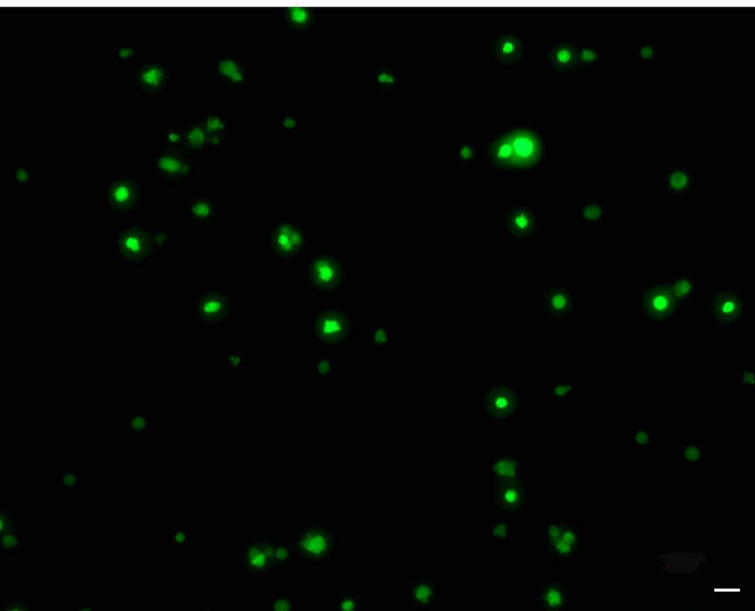**Phase-contrast imaging**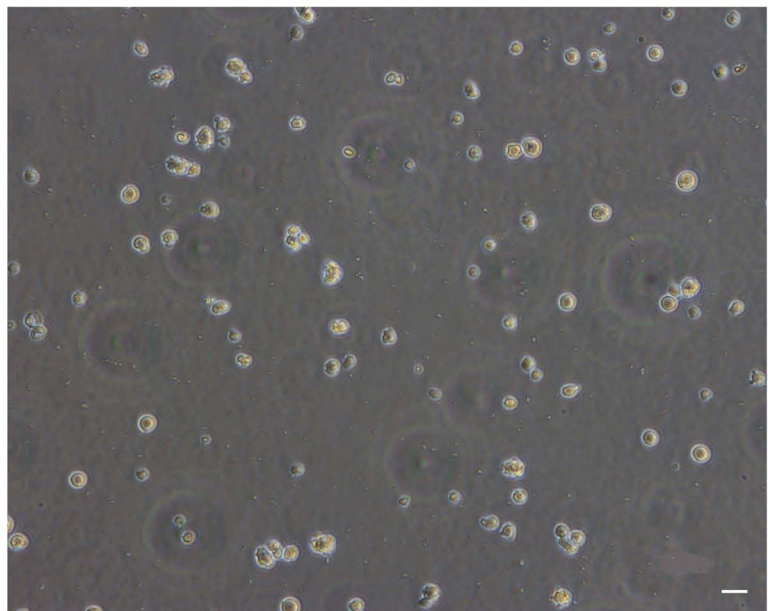**B**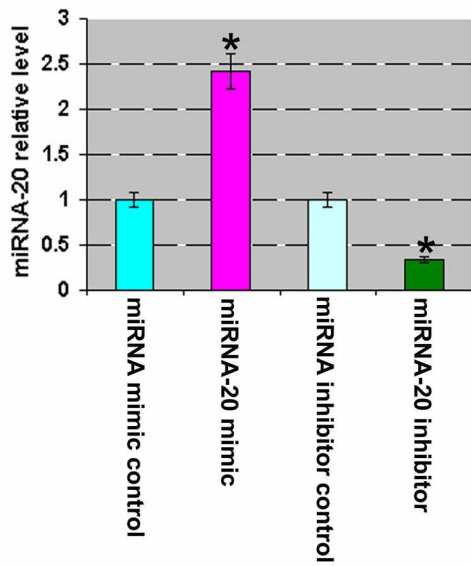**C**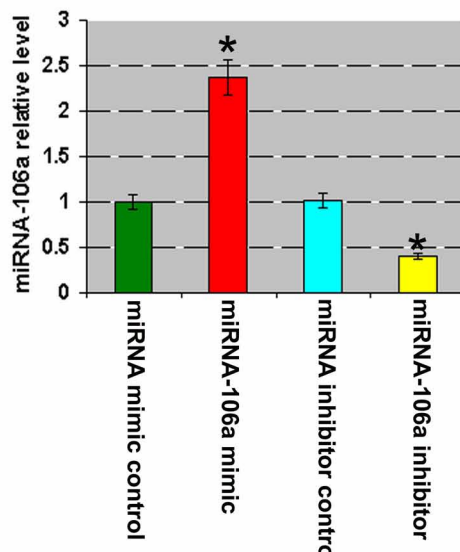

Supplement: NIHMS511357-supplement-Supp_Fig_S1-S3.pdf [file NIHMS511357-supplement-Supp_Fig_S1-S3.pdf]
